# Supplementary material
Source: PubMed Central journal article supplement (PMC2842453)
Supplement: NIHMS176584-supplement-supplement_1.pdf [file NIHMS176584-supplement-supplement_1.pdf]

1 dilution by Ly49C/I<sup>+</sup> (gray fill) and Ly49C/I<sup>-</sup> (black line) mixed bone marrow  
2 chimeric Ly49H<sup>+</sup> wild-type and SHP-1<sup>Me-v</sup> NK cells 5 days after MCMV infection.  
3 Data are representative of three experiments with 2-3 animals each.

4

#### 5 **Figure 5: Unlicensed NK cells control MCMV infection**

6 MCMV titers in the (a) salivary glands and (b) liver one-week post infection in B6  
7 wild-type mice either untreated or depleted of Ly49C/I<sup>+</sup> NK cells, Ly49G2<sup>+</sup> NK  
8 cells, or all NK cells. Data are representative of two experiments with five mice  
9 per group. MCMV titers in the (c) salivary glands and (d) liver one-week post  
10 infection of B6 wild-type mice and *B2m*<sup>-/-</sup> mice, both depleted of CD8<sup>+</sup> T cells.  
11 Data are representative of two experiments with five mice per group.

12

#### 13 **Figure 6: Licensed NK cells do not protect neonates from MCMV infection**

14 *Ly49h*<sup>-/-</sup> neonates received (a) 1 x 10<sup>5</sup> Ly49H<sup>+</sup> NK cells sorted as either Ly49C/I<sup>+</sup>  
15 or Ly49G2<sup>+</sup>Ly49C/I<sup>-</sup> or PBS or (b) 7.5 x 10<sup>4</sup> Ly49H<sup>+</sup> NK cells from donors pre-  
16 depleted of Ly49C/I<sup>+</sup> or Ly49G2<sup>+</sup> cells *in vivo* or PBS and challenged with 2 x 10<sup>3</sup>  
17 pfu of MCMV. Animals were monitored daily for morbidity.

18

#### 19 **Online Methods**

##### 20 **Mice**

21 C57BL/6 mice were purchased from the National Cancer Institute. *B2m*<sup>-/-</sup> mice  
22 on the C57BL/6 background were purchased from Jackson Labs. S. Vidal  
23 generously provided *Ly49h*<sup>-/-</sup> B6 mice, and C. Lowell generously provided *SHP-*

1  $1^{me-v}$  B6 mice.  $H2K^bD^b^{-/-}$  B6 mice were purchased from Taconic. Mixed bone  
2 marrow chimeras were generated by mixing bone marrow from  $CD45.1^+$  wild-  
3 type and  $SHP-1^{Me-v}$  mice at a 1:4 ratio and injecting into  $CD45.1^+$  wild-type  
4 recipients following lethal (950 rads) irradiation. Chimeras were analyzed 8-10  
5 weeks post-reconstitution. All mice were maintained in the UCSF specific  
6 pathogen-free animal facility. The UCSF Institutional Animal Care and Use  
7 Committee approved animal protocols.

8

### 9 **Cell-based stimulation**

10 Target cells were generated by retrovirally transducing MCMV m157 into RMA  
11 and RMA-S cell lines.  $H-2K^b$  was blocked by addition of AF6-88.5 mAb. Naïve  
12 splenic NK cells were incubated 1:1 with target cells for 6 h in the presence of  
13 brefeldin A and anti- $CD107a$  (mAb 1D4B). Cells were then harvested and  
14 surface stained for  $Ly49C/I$  (mAb 5E6),  $NK1.1$  (mAb PK136),  $TCR\beta$  (mAb H57-  
15 597), and  $Ly49H$  (mAb 3D10) and for intracellular  $IFN-\gamma$  (mAb XMG1.2) by using  
16 the Intracellular Staining Kit from BD Biosciences. Antibodies were purchased  
17 from eBioscience, BD Biosciences, and BioLegend.

18

### 19 **CFSE labeling**

20 B6  $CD45.1^+$  splenocytes were labeled for 10 min at  $37^\circ C$  with  $2 \mu M$  CFSE in  
21 PBS, and washed twice in PBS.  $2 \times 10^7$  labeled splenocytes were transferred i.v.  
22 into naïve recipient mice. Recipient mice were infected with  $5 \times 10^4$  pfu MCMV  
23 and sacrificed five days later. Adoptively transferred NK cells were analyzed for

1 Ly49H and Ly49C/I expression and CFSE dilution by flow cytometry.  
2 Alternatively, splenocytes from CD45.1<sup>+</sup> WT x SHP-1<sup>Me-v</sup> mixed bone marrow  
3 chimeras were labeled in the same way and transferred into CD45.1<sup>+</sup>CD45.2<sup>+</sup>  
4 wild-type recipients.

5

### 6 **Stability of Ly49C/I expression**

7 Naïve DX5<sup>+</sup> TCRβ<sup>-</sup> NK cells were sorted as Ly49C/I<sup>+</sup>Ly49G2<sup>-</sup> or Ly49C/I<sup>-</sup>  
8 Ly49G2<sup>+</sup> and 1 x 10<sup>5</sup> cells were injected i.v. into CD45 congenically marked B6  
9 recipients. Recipients were infected one day later and Ly49H<sup>+</sup> donor NK cells  
10 were analyzed for Ly49C/I expression six days post-infection.

11

### 12 **MCMV infection**

13 Six to eight week old mice were treated with 150 μg of depleting Ly49C/I (clone  
14 5E6), Ly49G2 (clone 14D11), NK1.1 (clone PK136), or CD8α (clone 2.43)  
15 monoclonal antibodies or were undepleted and then infected i.p. with 5x10<sup>4</sup> pfu  
16 MCMV (Smith strain) one day later. Thirty-six hours to 5 days later splenic NK  
17 cells were surface stained for Ly49H, NK1.1, Ly49C/I, and CD69 (clone H1.2F3)  
18 and intracellularly for IFN-γ and granzyme B (clone GB11). For viral titers,  
19 salivary glands and livers were harvested and snap frozen on dry ice in RPMI-  
20 1640 with 2% FCS. Samples were stored at -80°C, thawed, homogenized,  
21 plated on M2-10B4 cells (ATCC) in RPMI-1640 without FCS, and incubated for 2  
22 hrs at 37°C. RPMI-1640 with 10% FCS and 0.75% carboxymethyl cellulose was  
23 added and samples were incubated for 7-10 days. Plaques were visualized by

1 staining with crystal violet dye. For neonatal survival studies 2-3 day old mice  
2 were injected with  $1 \times 10^5$  Ly49H<sup>+</sup> NK cells sorted as either Ly49C/I<sup>+</sup> or Ly49C/I<sup>-</sup>  
3 Ly49G2<sup>+</sup> or received PBS only and infected one day later with  $2 \times 10^3$  pfu MCMV.  
4 Animals were monitored daily for morbidity. Alternatively,  $7.5 \times 10^4$  Ly49H<sup>+</sup> NK  
5 cells from adult donor mice pre-depleted of Ly49C/I<sup>+</sup> or Ly49G2<sup>+</sup> cells *in vivo* by  
6 treatment with depleting antibodies 5E6 or 4D11, respectively, were transferred  
7 into 2-3 day old Ly49h<sup>-</sup> B6 mice and infected one day later with  $2 \times 10^3$  pfu  
8 MCMV. Animals were monitored daily for morbidity.

9

## 10 **Statistical analysis**

11 Statistical differences in percentages of IFN- $\gamma$ <sup>+</sup>, CD107a<sup>+</sup>, and Ly49C/I<sup>+</sup> NK cells  
12 were determined by the paired, two-tailed Student's t test. Statistical differences  
13 in viral titers were determined by the unpaired, two-tailed Mann-Whitney test.  
14 Statistical differences in neonatal survival were determined by the Mantel-Cox  
15 test. Statistics were determined with Prism software (GraphPad Software, Inc.).

16

## 17 **References**

- 18 1. Lanier, L.L. NK cell recognition. *Annu Rev Immunol* **23**, 225-274 (2005).
- 19 2. Lanier, L.L. Up on the tightrope: natural killer cell activation and inhibition. *Nat*  
20 *Immunol* **9**, 495-502 (2008).
- 21 3. Binstadt, B.A. *et al.* Sequential involvement of Lck and SHP-1 with MHC-  
22 recognizing receptors on NK cells inhibits FcR-initiated tyrosine kinase  
23 activation. *Immunity* **5**, 629-638 (1996).
- 24 4. Long, E.O. Negative signaling by inhibitory receptors: the NK cell paradigm.  
25 *Immunol Rev* **224**, 70-84 (2008).
- 26 5. Nakamura, M.C. *et al.* Mouse Ly-49A interrupts early signaling events in natural  
27 killer cell cytotoxicity and functionally associates with the SHP-1 tyrosine  
28 phosphatase. *J Exp Med* **185**, 673-684 (1997).
